## **Clinical Decision Support Systems implementation in Africa: a systemic review**

Jacob Nii Noye Nortey<sup>1</sup>, Kate Takyi<sup>2</sup>, Andrew Adabo<sup>3</sup>, Rashida Suleiman<sup>4</sup>

<sup>1</sup>Department of Computer Science, Kwame Nkrumah University of Science and technology

[Niinoye93@gmail.com](mailto:Niinoye93@gmail.com)

<sup>2</sup>Department of Computer Science, Kwame Nkrumah University of Science and technology

takyikate@knust.edu.gh

<sup>3</sup>Department of Computer Science, Kwame Nkrumah University of Science and technology

[singingcelestials@yahoo.com](mailto:singingcelestials@yahoo.com)

<sup>4</sup>Department of Computer Science, Kwame Nkrumah University of Science and technology

[suleimanrashida@yahoo.com](mailto:suleimanrashida@yahoo.com)

## **Abstract**

The healthcare system in Africa is characterized by the lack of trained clinicians, resources, brain drain and quality care processes. To mitigate these challenges, some African countries have resorted to the use of health information technologies such as the Clinical Decision Support System (CDSS). Globally, CDSS implementations in the health sector have been reported to have reduced medical error, increased hospital accessibility and standard of care. Studies on the number of implemented CDSS in Africa were found to be limited since only a few are available. Despite this setback, the few implemented CDSSs are effective, efficient, and reliable in the diagnosis of diseases. In order to fully ascertain the impact of CDSS implementation in African counties, we evaluated the documented CDSS programs that are in operation. An extensive search was performed on Google Scholar, PubMed, and SCOPUS. About 38 (thirty-eight) publications were identified, of which some met the inclusion criteria. Limited implementation of CDSS was observed in the African countries. The review showed promising impacts of CDSS in African healthcare centers especially in the diagnose and treatment of pediatric and maternal related disease.

**Keywords:** Clinical decision support systems, Africa, health informatics, and decision support systems

## 1.0 Introduction and Background

It is approximated that more than eight million people from Low - and Medium - Income Countries (LMIC) die annually due to diagnosis error, poor healthcare quality and medical error [1]. Consequently, in 2015, an estimated amount of \$6 million was lost due to decreased productivity [1]. Studies conducted in the United States indicated that up to 9800 US citizens die annually due to avoidable medical or diagnosis error [2]. Schiff et al. defined diagnosis error as inaccuracy or aberrations in medical diagnosis procedures leading to over diagnosis, under-diagnosis, or concealed diagnosis [3]. Another study conducted in the US on the topic “errors of diagnosis in pediatric practices” attested that 54% of the pediatricians indicated making diagnosis errors at least twice a month [4].

To address these setbacks, countries around the world, especially the developed countries, have made huge investments in the health sector [5]. One of such investments is in the usage of health information technology to achieve quality healthcare. This paper seeks to evaluate the implementation of one of the health information technologies; Clinical Decision Support System (CDSS) in Africa. Traditionally, CDSS was designed as part of the Computerized Physician Order Entry (CPOE) application and functions as a device used to prevent over diagnosis. However, Kawamoto et al, defined CDSS as a program module designed to help clinicians make decisions about a patient at a point of care [5]. CDSS over the years is useful in the diagnosis, management, and treatment of diseases.

Many health information management organizations have developed and implemented numerous clinical decision support systems over the past decades. A typical example of a CDSS is DXplain. This decision support system was originally developed by Dr. Barnett Octo as an education tool [6]. It is now used commercially for both educational and diagnosis purposes. Another example is the Theradoc antibiotic assistant CDSS. This tool combines a patient’s electronic medical history, laboratory investigations, pharmacy, and radiological sections to prescribe an antibiotic administration to a patient [7]. Similarly, MYCIN and Firstline decision support systems also work in this manner to provide effective antibiotic choice to patients. Other examples of CDSS include; EuroCAT, HELP, and Quick Medical Reference, etc.

## 2.0 Literature review

The healthcare system in Africa is characterized by poor quality of service, lack of equipment, and deficits in the number of health practitioners. Oleribe et al. research in Mozambique identified challenges with human resources, financial quotas to health services, and poor management services [8]. Similar studies by Edzie in Ghana and Nigeria also observed a huge deficit in the number of radiologists per 100,000 patients, which is more than WHO recommendations [9]. In effect, one can further conclude that the healthcare system in Africa, especially in Sub-Saharan African countries, is a weak system, which is a major barrier to fulfilling the Sustainable Development Goals such as SDGs 3, 4, 5, and 6 [10].

## **2.1 Clinical Decision Support Systems in Africa**

Literature reviews indicate a lack of CDSS implementation in Africa. This may be because of the lack of funding in the health sector [8]. Another reason may be the lack of robust health information management system technologies on the continent. Health information technologies are useful in the design and implementation of any CDSS. This is because it provides an overview of patient information, which forms the backbone in the design of CDSS [11].

Furthermore, some African countries have still not implemented the electronic medical record system and are using the conventional methods. This smacks down on the design and implementation of CDSS. Despite all these challenges, some African countries are making progress in the gradual rollout of decision support systems. There have been many pilot programs in most of these African countries to evaluate the efficiency of CDSS in mitigating some of the health service challenges. Most of these pilot programs are largely driven by HIV treatments and maternal and neonatal mortality [12,13].

## **2.2 Functional modalities of Clinical Decision Support Systems**

### **2.2.1 Cost containment**

Cost containment can be defined as the process of effectively cost reductions in business. When implemented strategically, it can help increase the profit of an organization. Cost containment in CDSS is very important to both the patient and the health care provider. Research conducted by Algaze et al. found a reduction in the usage of laboratory resources when Computer Order Entry (CPOE) and daily checklist rule were used without affecting mortality rate [14].

Laboratory reagents are costly to the health care provider and the laboratory test is also costly to the patient. Therefore, with the advent of CDSS, we can eliminate tests, which are irrelevant to the diagnosis since the CDSS has a high prediction rate. Again, with this system, we can save money and time to both the patient and hospital.

Additionally, another research by McMullin et al. also showed the reduction in the cost of prescription by \$4.99 in the interference group [15]. CDSS can also provide cheaper alternatives to drugs. In Germany for instant, research showed 93.6% of drugs switch to cheap alternative

drugs [16]. One of such CDSS system tools is MYCIN, which gives therapeutic advice and provides a cheap alternative to each case.

### **2.2.2 Administrative functions**

CDSS tends to increase hospital documentations. Documentation of electronic health records is important for the early diagnosis of certain disease types. Documentation of splenectomy was also observed to have increased when the CDSS was implemented [17]. This documentation was performed to monitor patients who have been vaccinated following splenectomy, which has increased the risk of infections. Again, the implementation of CDSS was also observed to have addressed the inconsistencies and inaccuracy of coding of the International Statistical Classification of Disease (ICD) [18].

### **2.2.3 Diagnostic support**

Clinical decision support systems are computed schemes which are designed to aid clinicians in diagnosis. CDSS mainly designed for diagnosis purposes are called Diagnosis Decision Support (DSS) and an example is Dxpain. Research conducted by Porat et al. reported that 74% of general practitioners found the Diagnosis Decision Support useful [19]. The general practitioners also said that the DSS enabled them to broaden their extent of diagnosis. Another study by Kunhimangalam et al. also observed 93% accuracy in the diagnosis of peripheral neuropathy [20].

### **2.2.4 Managing clinical complexity and details**

In most hospitals, disease treatment guidelines are not strictly adhered to. Most general practitioners rely on experience rather than following protocols and guidelines established by health organizations in disease treatments and management. With the advent of CDSS, the protocols have now been adhered to since the guidelines are infused in the design process of the CDSS tools. An example of this is an observational study by Kwokk et al. The study took 50 patients who were then compared with 50 historical bridges. A CDSS tool Asthma Clinical Assessment Form and Electronic decision support (ACAFE) was used to document and manage asthma patients. Statistically significant ( $p < .01$ ) association with higher levels of certification of severity of asthma was observed because the ACALE contained guidelines for asthma management which were strictly adhered to compared to the 50 historical controls [21].

## **2.3 Challenges of Clinical Decision Support Systems**

Despite all promising benefits of CDSS, the challenges associated with its usage cannot be overridden. A challenge identified by Antoniadi et al is the issue of trust with the system. Clinicians find it difficult to use the CDSS as in certain conflicts with the diagnosis of the attending physician [22]. Another challenge is the perception of general practitioners. Porat et al.

reported that 38% of general practitioners felt that the system took a longer time to give an output [19].

Sittig et al. also argued that for an effective implementation and usage of CDSS, the following must be taken into consideration: improve the usefulness of clinical decision support interventions (which includes human – computer interface, prioritization of filter recommendation, usage of free text information etc.), creation of new clinical decision support interventions, and sharing of data driven from CDSS implementations [23].

## **2.4 Ethical concerns with Clinical Decision Support Systems**

The usage of technology in healthcare delivery is on the ascendancy, and as such prudent measures must be taken to ensure the safety of patients since CDSS in most countries has been integrated with patients' electronic health records. Research conducted by Čartolovni et al. concurred that a review of 1,108 papers showed prevalent issues with patient protection, liability and accountability on both the CDSS developer and the healthcare center, lack of meaningful documentation and regulations and the effect of CDSS on the patient and physician relationships [24]. One can therefore argue that in any event of wrong medical diagnosis of the decision support system, which leads to the death of the patient, who becomes liable and who will be accountable.

Another research conducted by De Panfilis et al. also illustrated the need for the right to autonomy by patients when an artificial intelligence-based decision support system is used to predict palliative care. CDSS tends to predict and signal treatment to patients who require extensive and complex treatments [24,25]. It is necessary to take into consideration the emotional state of the patient, financial, and right to quality of life. Therefore, after the decision support system has indicated the treatment plans, steps must be adopted to take into consideration the rights of the patient.

## **3.0 Method**

### **3.1 Publication identifications**

Thorough searches were made on Google Scholar, SCOPUS, and PubMed employing the following key terms;

- Clinical decision support system and Africa
- Clinical decision support systems and implementation
- Health informatics and Africa
- Decision support system and Africa

### **3.2 Inclusion criteria**

Publications of interest, which were in line with this study's literature, were selected. A total of eight (8) publications were obtained.

### 3.3 Exclusion criteria

Reviews, duplications, and articles that do not fit literature review and personal opinions were eliminated. Fig 1.0 indicating evidence of search

Table 1. A summary of research attempting to quantify the scope and success of implemented clinical decision support systems in Africa.

| S/N | STUDY               | YEAR | COUNTRY  | STUDY DESIGN | RESULTS                                                                                                                                                                                            | BARRIERS IDENTIFIED                                                                                                                                                                             |
|-----|---------------------|------|----------|--------------|----------------------------------------------------------------------------------------------------------------------------------------------------------------------------------------------------|-------------------------------------------------------------------------------------------------------------------------------------------------------------------------------------------------|
| 1   | Amoakoh et al. [26] | 2019 | Ghana    | Experimental | Maternal protocol request is sent via SMS text - based mobile CDMSS was higher (68.99%) compared with neonatal request (31.01%) in the first 6 months, as reported by the forefront health workers | Detailed information as to the usage of the USSD by the forefront health workers who received the project phone was not properly documented to evaluate the overall success of the intervention |
| 2   | Keitel et al. [27]  | 2017 | Tanzania | Experimental | It was observed that electronic Point-of-Care Testing (ePOCT) enhanced clinical manifestations while also reducing antibiotic prescription                                                         | ePOCT was found to be very costly due to the additional features it requires to fully function. Again, the study was restricted to one particular geographical location so                      |

|   |                        |      |              |                 |                                                                                                                                                                                          |                                                                                                                                                                                                                         |
|---|------------------------|------|--------------|-----------------|------------------------------------------------------------------------------------------------------------------------------------------------------------------------------------------|-------------------------------------------------------------------------------------------------------------------------------------------------------------------------------------------------------------------------|
|   |                        |      |              |                 | error from 30% to 11% compared with ALMANACH                                                                                                                                             | findings cannot be generalized.                                                                                                                                                                                         |
| 3 | Blanchet et al. [28]   | 2015 | Burkina Faso | Descriptive     | Evaluating the adherence to IMCI guidelines, cost effectiveness, and user acceptability in the usage of IeDA                                                                             | The evaluation needs to be done by health center type, locations, and attitudes of health workers toward change.                                                                                                        |
| 4 | Akinnuwesi et al. [29] | 2020 | Nigeria      | Experimental    | RMDFCM decision support system evaluation suggested an improvement in the diagnostic accuracy (87%), sensitivity (90%), and specificity (80%) compared with conventional medical methods | The RMDFCM decision support system must take into consideration the culture of the geographical locations in the design and implementation. It does not also present the actual view of the entire diagnosis procedure. |
| 5 | Franke et al. [30]     | 2018 | Ghana        | Cross-sectional | The algorithm - based IVR diagnosis was found to be performing well compared with examination by an attending                                                                            | The tendencies of confounders were not taken into consideration. In addition, the language used in the development of                                                                                                   |



|    |                     |      |                    |               |                                                                                                                                                                                                                                                                         |                                                                                            |
|----|---------------------|------|--------------------|---------------|-------------------------------------------------------------------------------------------------------------------------------------------------------------------------------------------------------------------------------------------------------------------------|--------------------------------------------------------------------------------------------|
|    |                     |      |                    |               | physician. For the IVR may be cough, a barrier to agreement = other ethnic 83.5%, Kappa groups within = 0.59 and for the locality fever, agreement = 82.3%, Kappa = 0.64                                                                                                |                                                                                            |
| 6. | Mensah et al. [31]  | 2015 | Tanzania and Ghana | Observational | Medical records and patient history documentation in both women countries that increased from 58.2% to 95.3% after the eCDSS was implemented in Ghana, excluding Tanzania. Again, there was no substantial increase in time spent on ANC activities when eCDSS was used | The study did not use the same observers in both countries that may lead to sampling bias. |
| 7. | Anokwah et al. [39] | 2012 | Kenya              | Experimental  | Results showed increased in desire to use the CDSS software, and the desire to continuously increase the implementation of CDSS.                                                                                                                                        | Short evaluation period coupled with lack of robustness to patient data protection.        |

|     |                               |      |                                  |                              |                                                                                                                                                    |                                                                                                                                     |
|-----|-------------------------------|------|----------------------------------|------------------------------|----------------------------------------------------------------------------------------------------------------------------------------------------|-------------------------------------------------------------------------------------------------------------------------------------|
| 8.  | Rambaud – Althaus et al. [40] | 2017 | Tanzania                         | Experimental                 | The ALMANACH showed an increase (74%) in check for signs in child danger detection and a drop in antibiotic prescription (71% to 26%) in children  | Reduced sample preparation and short implementation period                                                                          |
| 9.  | Sukums et al. [41]            | 2015 | Ghana, Tanzania and Burkina Faso | Experimental                 | The result of the study indicates high user acceptability and usage among local healthcare providers.                                              | No documentation to indicate whether the local facilities electronic health record was integrated into the development of the eCDSS |
| 10. | Jensen et al. [42]            | 2020 | South Africa                     | Qualitative and quantitative | The eIMCI was reported to improved practitioner’s indicator for self-efficacy and a high acceptability among care-givers and operational managers. | Most of the nurses (56%) indicated infrequent use of computer coupled with fewer training day                                       |

## **4.0 Discussions and Findings**

Literature search on the implementation of clinical decision support systems in Africa is limited [26-31]. This may be due to financial constraint, lack of proper documentation of implemented decision support systems, lack of training in health informatics, and the failure of countries to share data driven from the implementation of clinical decision support systems in Africa [32-34]. In effect, the analysis of the statistical usage and impact of the implemented CDSS cannot be fully ascertained to make meaningful policies. Discussions on the implemented CDSS in this paper have been categorized into three: (a) reliability, accuracy and speed of the implemented CDSS, (b) cost effect of CDSS, and (c) cultural integration of CDSS in healthcare centers in Africa.

### **4.1 Reliability, accuracy, and speed of implemented clinical decision support systems**

To successfully implement CDSS, speed, accuracy, and reliability are very crucial. Regardless of how wonderful a decision support system is, if it is slowing the workflow or takes lot of time to produce a report, it will be worthless and ineffective [35]. Lee et al. study on “implementation of physician order entry: user satisfaction and self – reported usage pattern” indicated that the ultimate determinant of user satisfaction in electronic CDSS is speed [36]. It was observed in the review of the Mensah et al. study that there was no significant increase in the time spent at ANC when the CDSS was implemented. Workflow was also found to be running smoothly without any delay [31]. Similar studies by Overhage et al. also argued that most of the physicians attested to the fact that the implemented CDSS improved their patient care [37].

Additionally, Akinnuwesi et al. observed the accuracy and reliability of their implemented decision support system. The implemented RMD FCM decision support system improved the diagnosis accuracy (87%) and sensitivity (90%) [29]. Again, a review of Franke et al. study in Ghana also indicated that the diagnosis made by the algorithm - based IVR was similar to attending physician examinations (for cough: agreement = 83.5%, Kappa = 0.59, for fever: agreement = 82.3%, Kappa = 0.64) [30]. In view of this, one can therefore argue that the CDSS program implementation in Africa has shown on various levels that it can be accurate and reliable in the diagnosis of disease.

### **4.2 Cost effectiveness of a clinical decision support system**

In any project management, cost effectiveness needs to be assessed to obtain the value of the project against the cost. The study by Keital et al., on the implemented ePOCT was found to be costly since it incorporated additional relevant features to the POCT [27]. It was observed from literature reviews that, there is limited data on the cost analysis of CDSS implementations in Africa. Future studies must focus on the cost analysis of CDSS.

### **4.3 Cultural integration of Clinical Decision Support System**

The success of decision support systems can also be attributed to the proper integration of the healthcare center's cultural practices in the design processes. Cultural integration is defined as the ability of CDSS algorithms, alerts, and guidelines to fit into the workflow of clinicians [38]. One limitation in the study by Blanchet et al. was the inability of the implemented decision support system to take into consideration the attitudes of healthcare workers toward change and the local needs of the individual healthcare centers [28]. It is therefore important to solicit the views, policies, and workflow of healthcare centers and integrate them into the algorithm of the CDSS. It is also important to note that the development of CDSS must not be generalized, and it should be planned to meet the specific needs of individual healthcare centers to achieve the desired results.

### **5.0 Conclusion and recommendations**

The implementation of Clinical Decision Support Systems in various African countries is promising. It has been demonstrated that it can be reliable and accurate in the diagnosis of diseases. This will help mitigate the compounding problems of health sector brain drain and lack of quality healthcare practices. The limitation of this study is the ability to provide more evidence on the cost analysis of the implemented CDSS in African countries.

In order to actualized the potentials of clinical decision support systems in Africa, we recommend the following; (1) Future studies should focus on comprehensive evaluation of cost analysis of CDSS implementation in Africa. (2) Health education institutes must include the concept and practical teaching of CDSS in their curriculum. (3) African countries must establish, enforce and regulate laws concerning accountability and liability in the development and implementation of CDSS.

## 6.0 References

- [1]. Kruk, M. E., Gage, A. D., Arsenault, C., Jordan, K., Leslie, H. H., Roder-DeWan, S., ... & Pate, M. (2018). High-quality health systems in the Sustainable Development Goals era: time for a revolution. *The Lancet global health*, 6(11), e1196-e1252.
- [2]. McGlynn, E. A., Asch, S. M., Adams, J., Keesey, J., Hicks, J., DeCristofaro, A., & Kerr, E. A. (2003). The quality of health care delivered to adults in the United States. *New England journal of medicine*, 348(26), 2635-2645.
- [3]. Schiff, G. D., Hasan, O., Kim, S., Abrams, R., Cosby, K., Lambert, B. L., ... & McNutt, R. A. (2009). Diagnostic error in medicine: analysis of 583 physician-reported errors. *Archives of internal medicine*, 169(20), 1881-1887.
- [4]. Singh, H., Thomas, E. J., Wilson, L., Kelly, P. A., Pietz, K., Elkeeb, D., & Singhal, G. (2010). Errors of diagnosis in pediatric practice: a multisite survey. *Pediatrics*, 126(1), 70-79.
- [5]. Kawamoto, K., Houlihan, C. A., Balas, E. A., & Lobach, D. F. (2005). Improving clinical practice using clinical decision support systems: a systematic review of trials to identify features critical to success. *Bmj*, 330(7494), 765.
- [6]. London, S. (1998). DXplainTM: a web-based diagnostic decision support system for medical students. *Medical Reference Services Quarterly*, 17(2), 17-28.
- [7]. Theradoc antibiotic assistant: [www.theradoc.com](http://www.theradoc.com) (assessed 7/04/2023)
- [8]. Oleribe, O. O., Momoh, J., Uzochukwu, B. S., Mbofana, F., Adebisi, A., Barbera, T., ... & Taylor-Robinson, S. D. (2019). Identifying key challenges facing healthcare systems in Africa and potential solutions. *International journal of general medicine*, 395-403.
- [9]. Edzie, E. K., Dzefi-Tettey, K., Gorleku, P. N., Idun, E. A., Osei, B., Cudjoe, O., . . . & Kusodzi, H. (2020). The application of information and communication technology in radiological practices: a cross-sectional study among radiologists in Ghana. *Journal of Global Health Reports*, 4, e2020046.
- [10]. Haines, A., Kuruvilla, S., & Borchert, M. (2004). Bridging the implementation gap between knowledge and action for health. *Bulletin of the World Health Organization*, 82(10), 724-731.
- [11]. Odekunle, F. F., Odekunle, R. O., & Shankar, S. (2017). Why sub-Saharan Africa lags in electronic health record adoption and possible strategies to increase its adoption in this region. *International journal of health sciences*, 11(4), 59.
- [12]. Akanbi, M. O., Ocheke, A. N., Agaba, P. A., Daniyam, C. A., Agaba, E. I., Okeke, E. N., & Ukoli, C. O. (2012). Use of electronic health records in sub-Saharan Africa: progress and challenges. *Journal of Medicine in the Tropics*, 14(1), 1.

- [13]. Amoakoh, H. B., Klipstein-Grobusch, K., Grobbee, D. E., Amoakoh-Coleman, M., Oduro-Mensah, E., Sarpong, C., ... & Ansah, E. K. (2019). Using mobile health to support clinical decision-making to improve maternal and neonatal health outcomes in Ghana: insights of frontline health worker information needs. *JMIR mHealth and uHealth*, 7(5), e12879.
- [14]. Algaze, C. A., Wood, M., Pageler, N. M., Sharek, P. J., Longhurst, C. A., & Shin, A. Y. (2016). Use of a checklist and clinical decision support tool reduces laboratory use and improves cost. *Pediatrics*, 137(1).
- [15]. McMullin, S. T., Lonergan, T. P., Rynearson, C. S., Doerr, T. D., Veregge, P. A., & Scanlan, E. S. (2004). The impact of an evidence-based computerized decision support system on primary care prescription costs. *The Annals of Family Medicine*, 2(5), 494-498.
- [16]. Pruszydlo, M. G., Walk-Fritz, S. U., Hoppe-Tichy, T., Kaltschmidt, J., & Haefeli, W. E. (2012). Development and evaluation of a computerized clinical decision support system for switching drugs at the interface between primary and tertiary care. *BMC medical informatics and decision making*, 12(1), 1-8.
- [17]. McEvoy, D., Gandhi, T. K., Turchin, A., & Wright, A. (2018). Enhancing problem list documentation in electronic health records using two methods: the example of prior splenectomy. *BMJ Quality & Safety*, 27(1), 40-47.
- [18]. Bell, C., Jalali, A., & Mensah, E. (2013). A decision support tool for using an ICD-10 anatomographer to address admission coding inaccuracies: a commentary. *Online journal of public health informatics*, 5(2).
- [19]. Porat, T., and Delaney, B. & Kostopoulou, O. The impact of a diagnostic decision support system on the consultation: perceptions of GPs and patients. *BMC Med Inform Decis Mak* 17, 79 (2017). <https://doi.org/10.1186/s12911-017-0477-6>
- [20]. Kunhimangalam, R., Ovallath, S., & Joseph, P. K. (2014). A clinical decision support system with an integrated EMR for the diagnosis of peripheral neuropathy. *Journal of medical systems*, 38, 1-14.
- [21]. Kwok, R., Dinh, M., Dinh, D., & Chu, M. (2009). Improving adherence to asthma clinical guidelines and discharge documentation from emergency departments: implementation of a dynamic and integrated electronic decision support system. *Emergency Medicine Australasia*, 21(1), 31-37.
- [22]. Antoniadi, A. M., Du, Y., Guendouz, Y., Wei, L., Mazo, C., Becker, B. A., & Mooney, C. (2021). Current challenges and future opportunities for XAI in machine learning-based clinical decision support systems: a systematic review. *Applied Sciences*, 11(11), 5088.

- [23]. Sittig, D. F., Wright, A., Osheroff, J. A., Middleton, B., Teich, J. M., Ash, J. S., ... & Bates, D. W. (2008). Grand challenges in clinical decision support. *Journal of biomedical informatics*, 41(2), 387-392.
- [24]. Čartolovni, A., Tomičić, A., & Mosler, E. L. (2022). Ethical, legal, and social considerations of AI-based medical decision-support tools: A scoping review. *International Journal of Medical Informatics*, 161, 104738.
- [25]. De Panfilis, L., Peruselli, C., Tanzi, S., & Botrugno, C. (2021). AI-based clinical decision-making systems in palliative medicine: ethical challenges. *BMJ Supportive & Palliative Care*.
- [26]. Amoakoh, H. B., Klipstein-Grobusch, K., Grobbee, D. E., Amoakoh-Coleman, M., Oduro-Mensah, E., Sarpong, C., ... & Ansah, E. K. (2019). Using mobile health to support clinical decision-making to improve maternal and neonatal health outcomes in Ghana: insights of frontline health worker information needs. *JMIR mHealth and uHealth*, 7(5), e12879.
- [27]. Keitel, K., Kagoro, F., Samaka, J., Masimba, J., Said, Z., Temba, H., ... & D'Acremont, V. (2017). A novel electronic algorithm using host biomarker point-of-care tests for the management of febrile illnesses in Tanzanian children (e-POCT): a randomized, controlled non-inferiority trial. *PLoS medicine*, 14(10), e1002411.
- [28]. Blanchet, K., Lewis, J. J., Pozo-Martin, F., Satouro, A., Somda, S., Ilboudo, P., ... & Cousens, S. (2015). A mixed methods protocol to evaluate the effect and cost-effectiveness of an Integrated Electronic Diagnosis Approach (IeDA) for managing childhood illnesses at primary health facilities in Burkina Faso. *Implementation Science*, 11(1), 1-9.
- [29]. Akinuwesi, B. A., Adegbite, B. A., Adelowo, F., Ima-Edomwonyi, U., Fashoto, G., & Amumeji, O. T. (2020). Decision support system for diagnosing rheumatic-musculoskeletal disease using fuzzy cognitive map technique. *Informatics in Medicine Unlocked*, 18, 100279.
- [30] Franke, K. H., Krumkamp, R., Mohammed, A., Sarpong, N., Owusu-Dabo, E., Brinkel, J., ... & Kreuels, B. (2018). A mobile phone - based tool to identify symptoms of common childhood diseases in Ghana: development and evaluation of the integrated clinical algorithm in a cross-sectional study. *BMC medical informatics and decision making*, 18, 1-10.
- [31]. Mensah, N., Sukums, F., Awine, T., Meid, A., Williams, J., Akweongo, P., ... & Blank, A. (2015). Impact of an electronic clinical decision support system on workflow in antenatal care: the QUALMAT eCDSS in rural health care facilities in Ghana and Tanzania. *Global health action*, 8(1), 25756.
- [32]. Horwood, C., Voce, A., Vermaak, K., Rollins, N., & Qazi, S. (2009). Experiences of training and implementation of integrated management of childhood illness (IMCI) in South

Africa: a qualitative evaluation of the IMCI case management training course. *BMC Pediatrics*, 9, 1-9.

[33]. Hurt, K., Walker, R. J., Campbell, J. A., & Egede, L. E. (2016). mHealth Interventions in Low and Middle-Income Countries: A Systematic Review. *Global journal of health science*, 8(9), 54429. <https://doi.org/10.5539/gjhs.v8n9p183>

[34]. Adepoju, I. O. O., Albersen, B. J. A., De Brouwere, V., van Roosmalen, J., & Zweekhorst, M. (2017). mHealth for clinical decision-making in sub-Saharan Africa: a scoping review. *JMIR mHealth and uHealth*, 5(3), e7185.

[35]. Spurr, C. D., Wang, S. J., Kuperman, G. J., Flammini, S., Galperin, I., & Bates, D. W. (2001). Confirming and delivering the benefits of an ambulatory electronic medical record for an integrated delivery system. In the TEPR 2001 Conference Proceedings.

[36]. Lee, F., Teich, J. M., Spurr, C. D., & Bates, D. W. (1996). The implementation of physician order entry: user satisfaction and self-reported usage patterns. *Journal of the American Medical Informatics Association*, 3(1), 42-55.

[37]. Overhage, J. M., Perkins, S., Tierney, W. M., & McDonald, C. J. (2001). Controlled trial of direct physician order entry: effects on physicians' time usage in ambulatory primary care internal medicine practices. *Journal of the American Medical Informatics Association*, 8(4), 361-371.

[38]. Maviglia, S. M., Zielstorff, R. D., Paterno, M., Teich, J. M., Bates, D. W., & Kuperman, G. J. (2003). Automating complex guidelines for chronic disease: lessons learned. *Journal of the American Medical Informatics Association*, 10(2), 154-165

[39]. Anokwa, Y., Ribeka, N., Parikh, T., Borriello, G., & Were, M. C. (2012, March). Design of a phone-based clinical decision support system for resource-limited settings. In *Proceedings of the Fifth International Conference on Information and Communication Technologies and Development* (pp. 13-24).

[40]. Rambaud-Althaus, C., Shao, A., Samaka, J., Swai, N., Perri, S., Kahama-Marro, J., ... & Genton, B. (2017). Performance of health workers using an electronic algorithm for the management of childhood illness in Tanzania: a pilot implementation study. *The American journal of tropical medicine and hygiene*, 96(1), 249.

[41]. Sukums, F., Mensah, N., Mpembeni, R., Massawe, S., Duysburgh, E., Williams, A., ... & Blank, A. (2015). Promising adoption of an electronic clinical decision support system for antenatal and intrapartum care in rural primary healthcare facilities in sub-Saharan Africa: The QUALMAT experience. *International journal of medical informatics*, 84(9), 647-657.



[42]. Jensen, C., McKerrow, N. H., & Wills, G. (2020). Acceptability and uptake of an electronic decision-making tool to support the implementation of IMCI in primary healthcare facilities in KwaZulu-Natal, South Africa. *Paediatrics and international child health*, 40(4), 215-226.
